# Supplementary material
Source: Springer Nature journal article supplement (https://www.springermedizin.de/resource/supplementary/12884_2008_177_MOESM10_ESM.pdf/9459788)
Supplement: MOESM10 [file 9459788]

# Index Test

# Study Details

# Likelihood ratio of positive test (95% CI)

# Likelihood ratio of negative test (95% CI)

| Threshold   | No of studies | No of women |
|-------------|---------------|-------------|
| AFP>3.0MoM  | 1             | 1998        |
| AFP>2.5MoM  | 6             | 119,709     |
| AFP>2.0MoM  | 10            | 103,627     |
| AFP>1.5MoM  | 2             | 4,613       |
| AFP>1.35MoM | 1             | 51,008      |
| AFP>1.28MoM | 1             | 178         |
| AFP>0.82MoM | 1             | 51,008      |
| AFP>0.58MoM | 1             | 51,008      |
| AFP<0.44MoM | 1             | 51,008      |
| AFP<0.4MoM  | 1             | 13,486      |

| Threshold                    | No of studies | No of women |
|------------------------------|---------------|-------------|
| AFP>95 <sup>th</sup> centile | 1             | 828         |
| AFP>90 <sup>th</sup> centile | 2             | 648         |
| AFP>3.0MoM                   | 1             | 333         |
| AFP>2.5MoM                   | 5             | 15,023      |
| AFP>2.0MoM                   | 10            | 45,158      |
| AFP>1.7MoM                   | 1             | 147         |
| AFP>1.6MoM                   | 1             | 358         |
| AFP>1.5MoM                   | 2             | 4,354       |
| AFP>1.0MoM                   | 1             | 1,739       |
| AFP<10 <sup>th</sup> centile | 1             | 172         |

| Threshold   | No of studies | No of women |
|-------------|---------------|-------------|
| AFP>3.0MoM  | 1             | 15,705      |
| AFP>2.5MoM  | 2             | 111,048     |
| AFP>2.0MoM  | 4             | 101,597     |
| AFP>1.5MoM  | 1             | 1,739       |
| AFP>1.0MoM  | 2             | 52,747      |
| AFP<0.44MoM | 1             | 51,008      |

| Threshold                    | No of studies | No of women |
|------------------------------|---------------|-------------|
| AFP>95 <sup>th</sup> centile | 1             | 220         |
| AFP>90 <sup>th</sup> centile | 1             | 476         |
| AFP>3.0MoM                   | 2             | 4,424       |
| AFP>2.5MoM                   | 2             | 5,619       |
| AFP>2.0MoM                   | 3             | 23,694      |
| AFP<0.44MoM                  | 1             | 13,486      |

| Threshold  | No of studies | No of women |
|------------|---------------|-------------|
| AFP>2.0MoM | 1             | 7,307       |

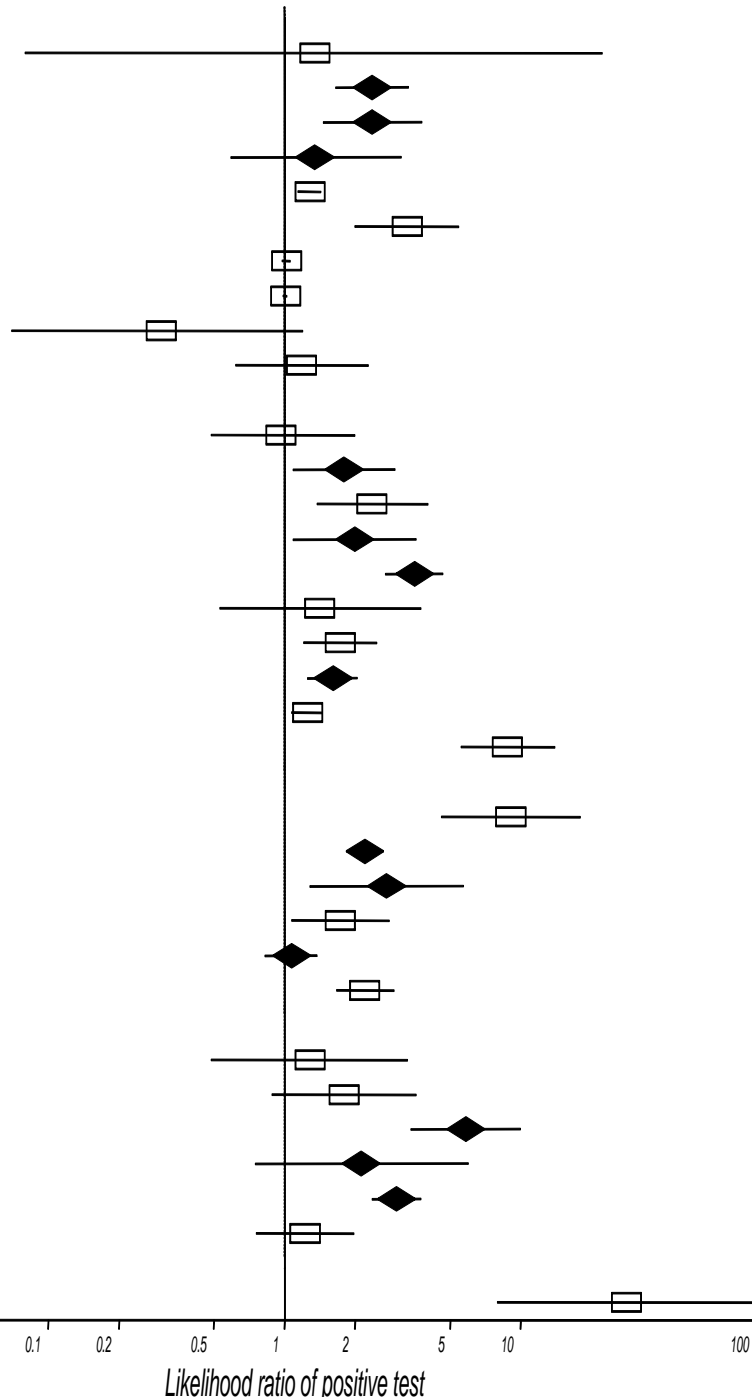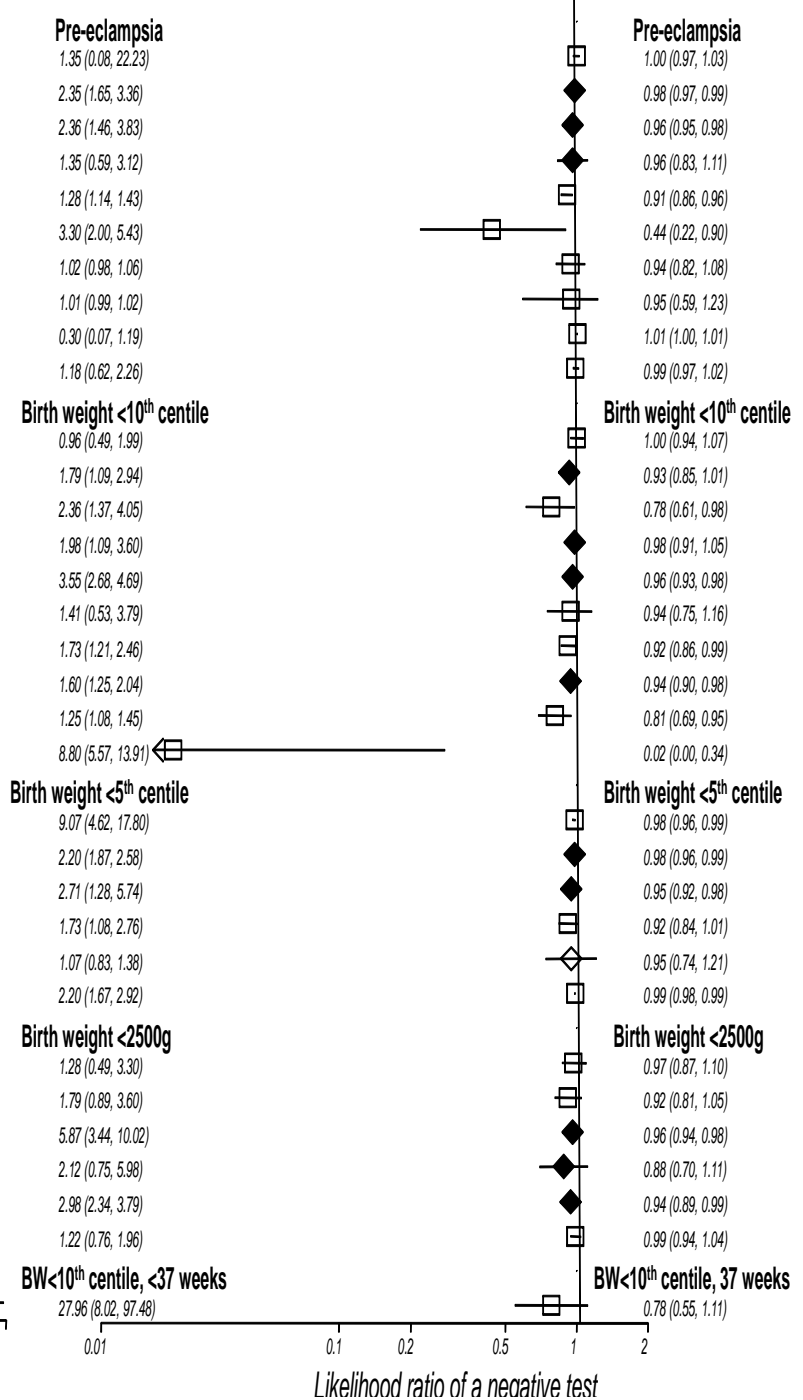

## Pre-eclampsia

1.35 (0.08, 22.23)  
 2.35 (1.65, 3.36)  
 2.36 (1.46, 3.83)  
 1.35 (0.59, 3.12)  
 1.28 (1.14, 1.43)  
 3.30 (2.00, 5.43)  
 1.02 (0.98, 1.06)  
 1.01 (0.99, 1.02)  
 0.30 (0.07, 1.19)  
 1.18 (0.62, 2.26)

## Pre-eclampsia

1.00 (0.97, 1.03)  
 0.98 (0.97, 0.99)  
 0.96 (0.95, 0.98)  
 0.96 (0.83, 1.11)  
 0.91 (0.86, 0.96)  
 0.44 (0.22, 0.90)  
 0.94 (0.82, 1.08)  
 0.95 (0.59, 1.23)  
 1.01 (1.00, 1.01)  
 0.99 (0.97, 1.02)

## Birth weight <10<sup>th</sup> centile

0.96 (0.49, 1.99)  
 1.79 (1.09, 2.94)  
 2.36 (1.37, 4.05)  
 1.98 (1.09, 3.60)  
 3.55 (2.68, 4.69)  
 1.41 (0.53, 3.79)  
 1.73 (1.21, 2.46)  
 1.60 (1.25, 2.04)  
 1.25 (1.08, 1.45)  
 8.80 (5.57, 13.91)

## Birth weight <10<sup>th</sup> centile

1.00 (0.94, 1.07)  
 0.93 (0.85, 1.01)  
 0.78 (0.61, 0.98)  
 0.98 (0.91, 1.05)  
 0.96 (0.93, 0.98)  
 0.94 (0.75, 1.16)  
 0.92 (0.86, 0.99)  
 0.94 (0.90, 0.98)  
 0.81 (0.69, 0.95)  
 0.02 (0.00, 0.34)

## Birth weight <5<sup>th</sup> centile

9.07 (4.62, 17.80)  
 2.20 (1.87, 2.58)  
 2.71 (1.28, 5.74)  
 1.73 (1.08, 2.76)  
 1.07 (0.83, 1.38)  
 2.20 (1.67, 2.92)

## Birth weight <5<sup>th</sup> centile

0.98 (0.96, 0.99)  
 0.98 (0.96, 0.99)  
 0.95 (0.92, 0.98)  
 0.92 (0.84, 1.01)  
 0.95 (0.74, 1.21)  
 0.99 (0.98, 0.99)

## Birth weight <2500g

1.28 (0.49, 3.30)  
 1.79 (0.89, 3.60)  
 5.87 (3.44, 10.02)  
 2.12 (0.75, 5.98)  
 2.98 (2.34, 3.79)  
 1.22 (0.76, 1.96)

## Birth weight <2500g

0.97 (0.87, 1.10)  
 0.92 (0.81, 1.05)  
 0.96 (0.94, 0.98)  
 0.88 (0.70, 1.11)  
 0.94 (0.89, 0.99)  
 0.99 (0.94, 1.04)

## BW<10<sup>th</sup> centile, <37 weeks

27.96 (8.02, 97.48)

## BW<10<sup>th</sup> centile, 37 weeks

0.78 (0.55, 1.11)
